# Supplementary material
Source: Copernicus journal article supplement (doi:10.5194/acp-26-7127-2026)
Supplement: Supplementary file 1 [file acp-26-7127-2026-supplement.pdf]

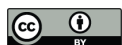

*Supplement of*

## **A satellite observation-based analysis of cirrus ice crystal number concentrations and underlying cirrus formation mechanisms over the Tibetan Plateau**

**Kai Wang et al.**

*Correspondence to:* Qianshan He (oxeye75@163.com)

The copyright of individual parts of the supplement might differ from the article licence.

This file includes Supplementary Figs. S1–S7, which can be presented as follows:

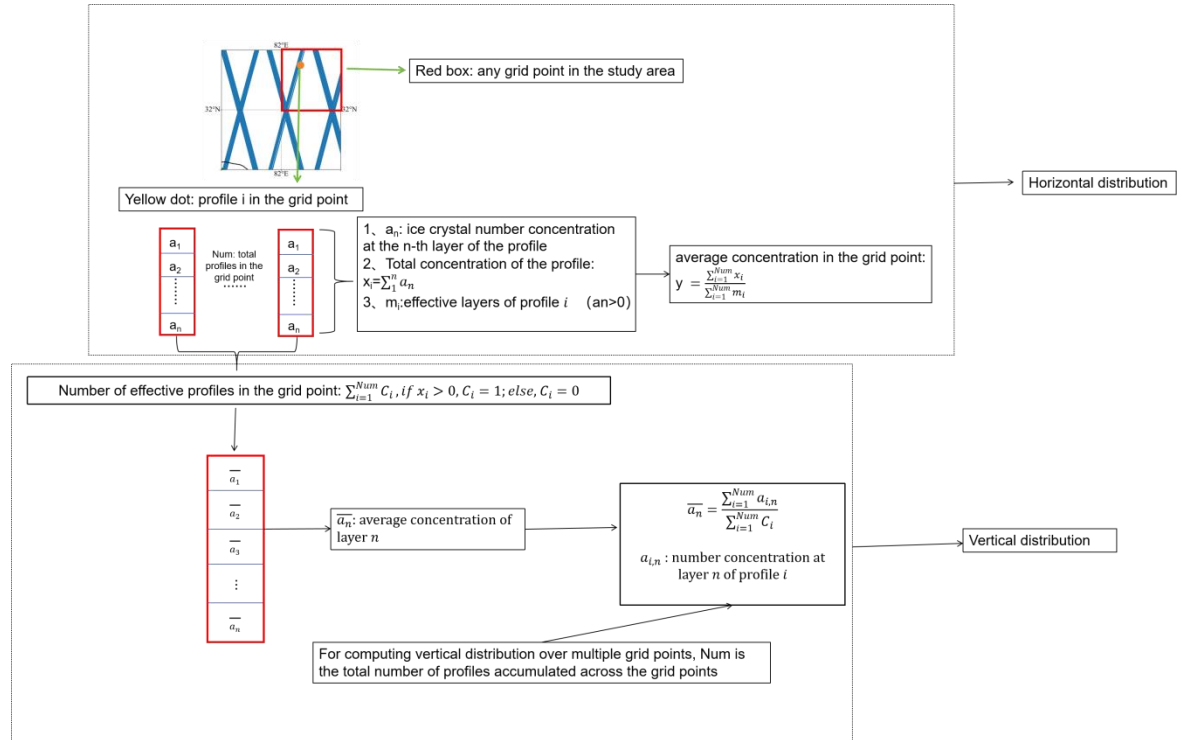

**Fig. S1.** Procedure for deriving  $N_i$  statistics, including calculations in both the horizontal and vertical directions.



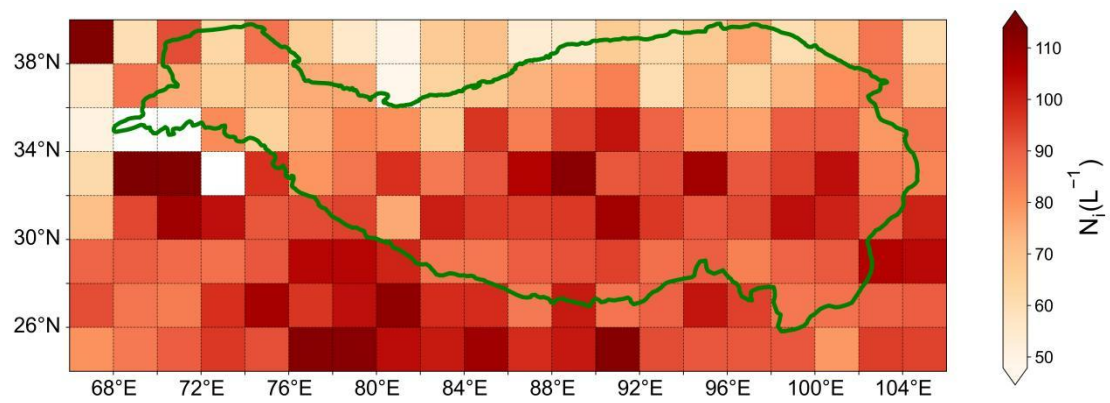

**Fig. S3.** Horizontal distribution of the averaged  $N_i (>25 \text{ um})$  during the summer from 2006 to 2016 (except 2011) over the TP. The green line is the border of the TP.

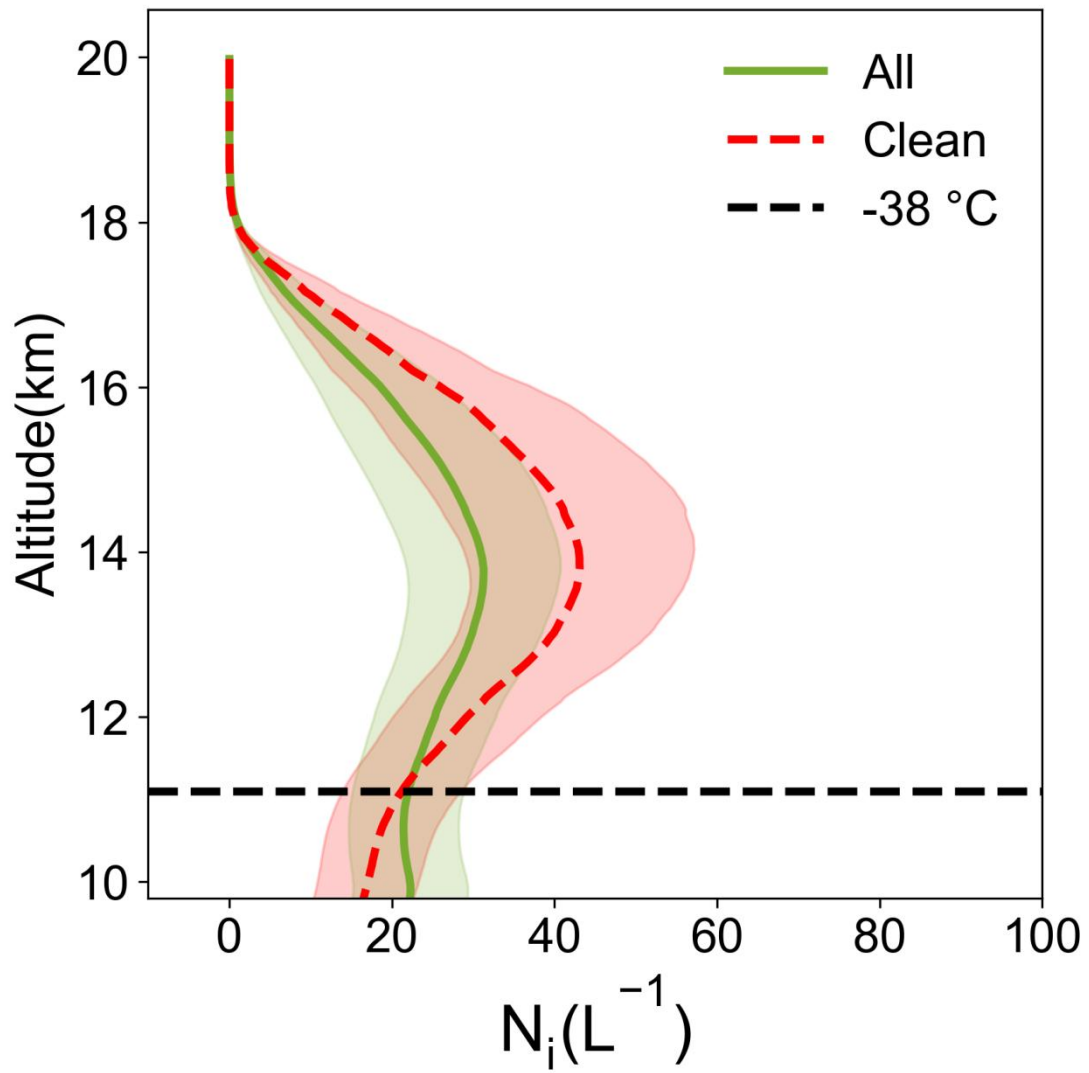

**Fig. S4.** Vertical profiles of  $N_i (>25 \text{ um})$  for all satellite-retrieved cases ('all') and for clean aerosol conditions ('clean'), with light shading indicating the standard error range.

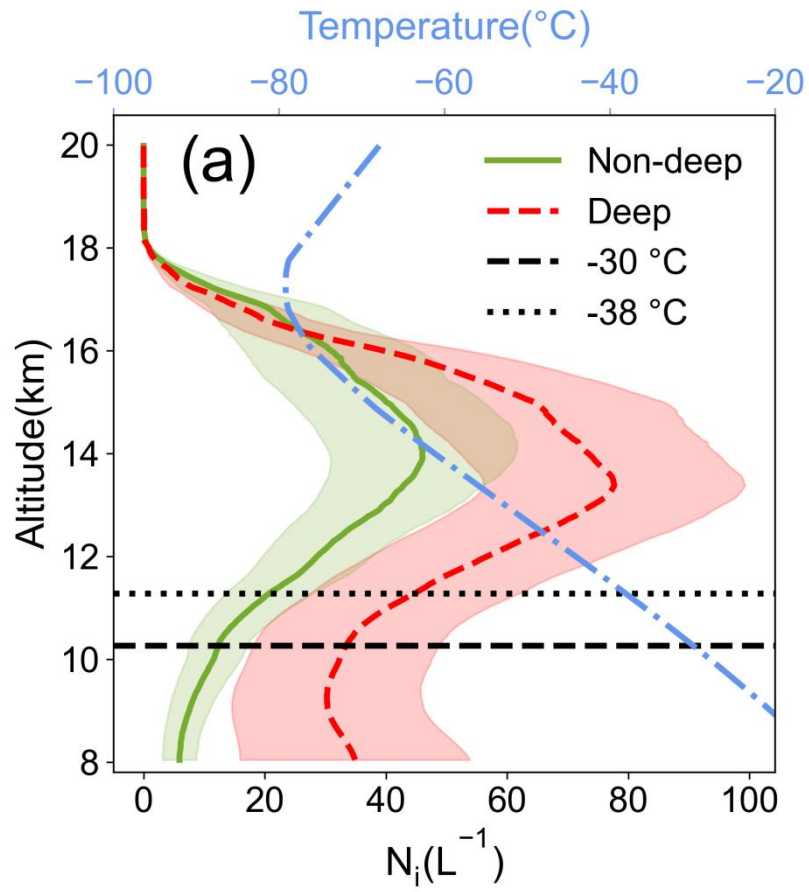

Fig. S5. Vertical profile of the  $N_i (>25 \text{ um})$  affected by DCO.

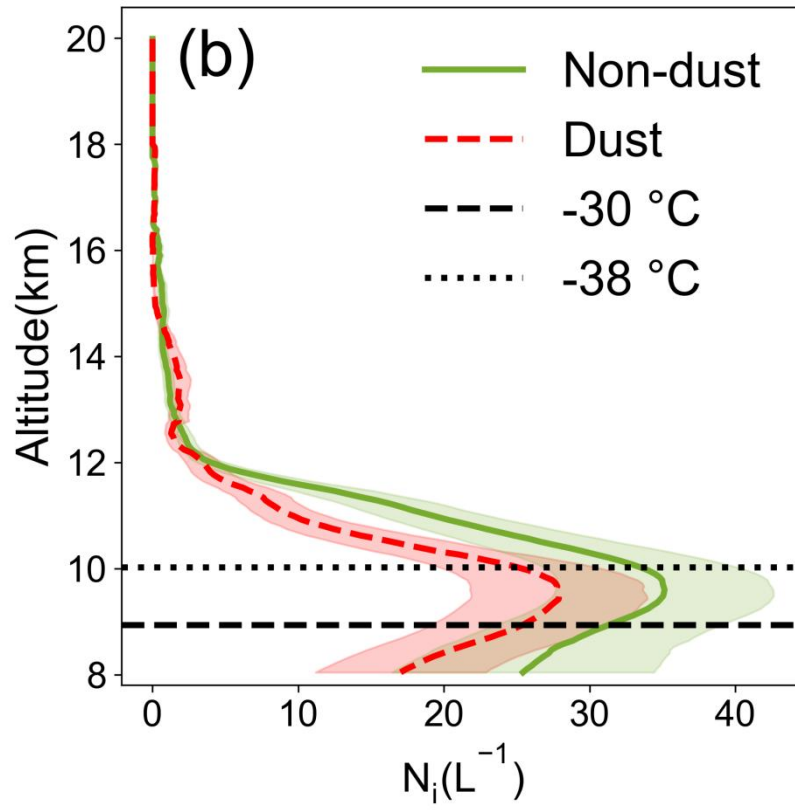

**Fig. S6.** The vertical profile of the  $N_i$  ( $>25 \mu\text{m}$ ) affected by dust and non-dust events. Here, ‘non-dust’ refers to all cases in which CALIPSO does not detect dust aerosols, including clean aerosol conditions.

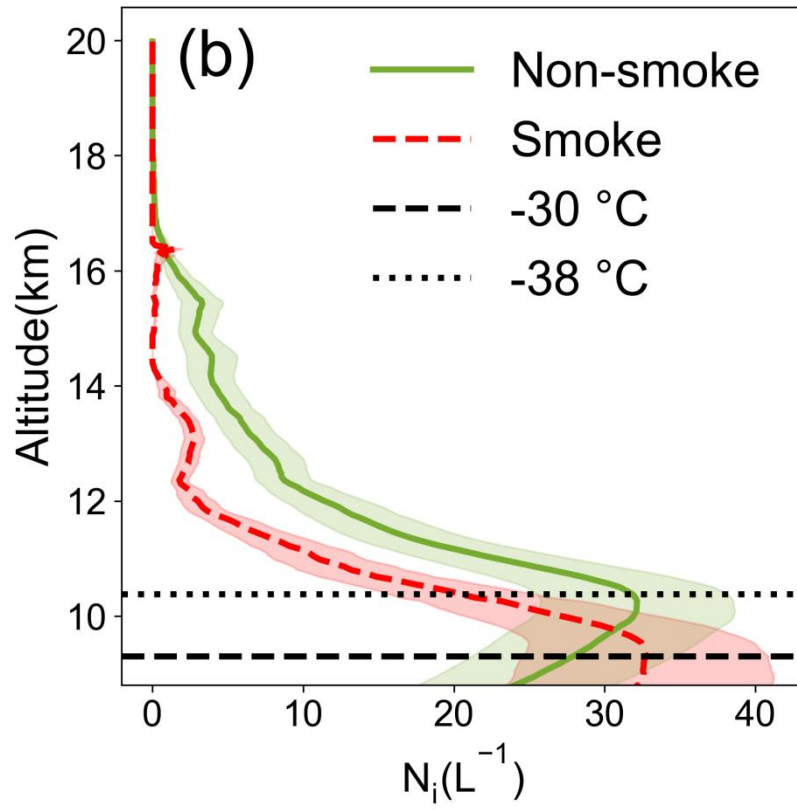

**Fig. S7.** The vertical profile of the  $N_i (>25 \text{ um})$  affected by smoke and non-smoke events. Here, 'non-smoke' refers to all cases in which CALIPSO does not detect smoke aerosols, including clean aerosol conditions.
